1  
2 Intraspecific genetic variation for anesthesia success in a New Zealand freshwater snail  
3 Qiudong Song<sup>1\*</sup>, Richard Magnuson<sup>1\*</sup>, Joseph Jalinsky<sup>1</sup>, Marissa Roseman<sup>1</sup>, and  
4 Maurine Neiman<sup>1,2</sup>

5 <sup>1</sup>*Department of Biology, University of Iowa, Iowa City, IA, USA*

6 <sup>2</sup>*Department of Gender, Women's, and Sexuality Studies, University of Iowa, Iowa City,*  
7 *IA, USA*

8 *\*Co-first authors and contributed equally*

9  
10 Corresponding author: Maurine Neiman, [maurine-neiman@uiowa.edu](mailto:maurine-neiman@uiowa.edu), ORCID ID 0000-  
11 0002-1543-8115

### 13 **Acknowledgements:**

14 We gratefully acknowledge Molly Gallagher, Sydney Stork, Benjamin Ripperger, and  
15 Alexander Kern for snail care. John Logsdon contributed to snail collections. David  
16 ("Davey") Neiman contributed his Excel expertise to data analysis. Several anonymous  
17 reviewers of an earlier version of the manuscript provided valuable feedback. The  
18 University of Iowa Department of Biology Honors program, the Iowa Center for  
19 Undergraduate Research, and Rick and Linda Maxson logistically and financially  
20 supported several undergraduate researchers involved in the project. The SNP  
21 genotyping described here was also supported by National Science Foundation - MCB  
22 1122176, National Science Foundation - DEB 1731657, and National Science  
23 Foundation - DEB 1601242.

24

25 **ABSTRACT**

26 Intraspecific genetic variation can drive phenotypic variation even across very closely  
27 related individuals. Here, we demonstrate that genetic differences between snails are a  
28 major contributor to wide variation in menthol anesthesia success in an important  
29 freshwater snail model system, *Potamopyrgus antipodarum*. Anesthesia is used to  
30 immobilize organisms for experiments and surgical procedures and to humanely  
31 mitigate pain. This is the first example of which we are aware of a role for genetic  
32 variation in anesthesia success in a mollusk. These findings highlight the fact that using  
33 only one strain or lineage for many experiments will not provide a full picture of  
34 phenotypic variation, demonstrate the importance of optimizing biomedically relevant  
35 techniques and protocols across a variety of genetic backgrounds, illuminate a potential  
36 mechanism underlying previously documented challenges in molluscan anesthesia, and  
37 set the stage for powerful and humane manipulative experiments in *P. antipodarum*.

38 **Keywords:** *Potamopyrgus antipodarum*, gastropod, mollusk, asexual, pain

39 **Declarations**

40 **Funding:** The study was funded by NSF-MCB 1122176, NSF-DEB 1731657, NSF-DEB  
41 1601242.

42 **Conflicts of interest:** The authors declare that they have no conflict of interest.

43 **Ethics approval:** Not applicable.

44 **Consent to participate:** Not applicable.

45 **Consent for publication:** Not applicable.

46 **Availability of data and material:** Data will be made available upon request.

47 **Code availability:** Not applicable

48 **Authors' contributions:** Maurine Neiman, Richard Magnuson, and Qiudong Song  
49 designed the study. Richard Magnuson and Qiudong Song collected the snail  
50 phenotype data. Joseph Jalinsky and Marissa Roseman generated the SNP data.  
51 Maurine Neiman analyzed the phenotype data and Joseph Jalinsky analyzed the SNP  
52 data. Maurine Neiman, Richard Magnuson, and Qiudong Song wrote the manuscript,

53 and Joseph Jalinsky and Marissa Roseman provided editorial revisions. All authors  
54 approved the final manuscript.  
55

## 56 INTRODUCTION

57 While the establishment of genotype-phenotype links remains one of the outstanding  
58 open questions in biology (Mackay and Huang 2018; Baier et al. 2019; National  
59 Academies of Sciences 2020), there is clear consensus that genetic variation drives  
60 important behavioral (e.g., Niepoth and Bendesky 2020), neurological (e.g., Trimmer et  
61 al. 2019), physiological (e.g., Faralli and Lawson 2020; Gibney 2020), and life history  
62 (e.g., Takou et al. 2019) traits. Here, we demonstrate the existence of genetic variation  
63 for the phenotype of anesthesia efficacy in *Potamopyrgus antipodarum*, a New Zealand  
64 freshwater snail.

65 Anesthesia efficacy is a trait of interest to many both for its ethical and biomedical  
66 importance and as well as its existence at the nexus of physiology and neurobiology.  
67 From an ethical perspective, although animal welfare regulations often exclude  
68 invertebrates at least in part because how invertebrates process pain is not well  
69 understood (Cooper 2011; Gilbertson and Wyatt 2016; AMVA 2020), invertebrates  
70 nevertheless exhibit clear responses to stimuli that could be perceived as perception of  
71 pain (AVMA 2020). Indeed, Canada, the United Kingdom, and the European Union  
72 have animal research regulations that extend protections to cephalopods (Butler-  
73 Struben et al. 2018), potentially signifying a paradigm shift regarding which taxa  
74 deserve formal protections. The basis for animal welfare regulation of cephalopod  
75 research is the assumption, rooted in observational studies (e.g., Wells 1978; Roper  
76 and Hochberg 1988), that cephalopods perceive pain and exhibit emotional responses.  
77 This assumption has since been backed up empirically (e.g., Scientific Panel on Animal  
78 Health and Welfare 2005; Crook et al. 2013).

79 From the perspective of the biomedical community, anesthesia efficacy is important  
80 because researcher perception of the wellbeing of a research organism can affect study  
81 outcomes. For example, as outlined by Poole (1997), conclusions reached from studies  
82 using organisms under distress may be unreliable, meaning that pain experienced by  
83 research organisms can influence study results and conclusions (also see AVMA 2020).

84 Other than cephalopods, there are no other general protections extended to  
85 invertebrates for use in research of which we are aware. In the absence of regulatory  
86 oversight, given the likelihood that at least some invertebrates perceive pain, and  
87 because some experimental procedures are facilitated by or require that the animal is  
88 immobilized, there is a clear demand for the ability to reliably and effectively apply  
89 anesthesia in invertebrates.

90 We here describe important steps forward in identifying an effective anesthesia  
91 technique for *Potamopyrgus antipodarum*, a New Zealand freshwater snail model  
92 system that is a prominent model system for the evolution of sexual reproduction (e.g.,  
93 Neiman et al. 2011), ecotoxicology (e.g., Geiß et al. 2017), invasion biology (e.g.,  
94 Donne et al. 2020), and host-parasite interactions (e.g., Bankers et al. 2017). Studies of  
95 *P. antipodarum* often incorporate tissue manipulation (e.g., tentacle severing as a test of  
96 tissue regeneration; Krois et al. 2013) or require determination of male vs. female status  
97 (e.g., Jalinsky et al. 2020). These studies either require or would be qualitatively  
98 improved by the availability of an effective, safe, and easy-to-use anesthetic.

99 Menthol crystals are the preferred method for anesthetizing *P. antipodarum* (e.g.,  
100 Krois et al. 2013), with a standard approach based on exposure of snails to crushed  
101 menthol crystals for ~90 minutes (McCraw 1958). While this method can be effective

102 (Krois et al. 2013), a considerable fraction (often >50%) of exposed *P. antipodarum* do  
103 not become anesthetized (Magnuson 2018). Similar intraspecific variation and generally  
104 low anesthesia efficiency has been reported in other mollusks (e.g., Fiorito et al. 2015;  
105 Butler-Struben et al. 2018).

106 Magnuson (2018) noted that some *P. antipodarum* lineages (defined as all snails  
107 descended from a single, laboratory-isolated female) seemed to have markedly higher  
108 anesthesia success than others. This observation led us to hypothesize that this lineage  
109 effect points to an important role of genetic background in anesthesia success in these  
110 snails. This hypothesis finds indirect support from reports of genetically based  
111 differences in anesthesia efficacy in rodents (e.g., Chesler et al. 2003; Moghil et al.  
112 2005; Seltzer 2014), insects (e.g., Guan et al. 2000), and roundworms (Morgan and  
113 Sedensky 1994; Hawasli et al. 2004; reviewed in Nash 2002; Steele et al. 2007).

114 Here, we performed the first test of which we are aware of a genetic basis for  
115 anesthesia efficacy in mollusks by subjecting different genetic lineages of common  
116 garden-born and raised *P. antipodarum* asexual lineages to the same menthol  
117 anesthesia protocol. The presence of significance across-lineage variation in anesthesia  
118 success would be consistent with this hypothesis, suggesting that some *P. antipodarum*  
119 genetic backgrounds are more susceptible to menthol anesthesia than others. This  
120 result will be useful to other *P. antipodarum* and mollusk researchers going forward,  
121 highlighting a potential explanation for frequently reported challenges in anesthesia  
122 success and indicating that at least some experiments requiring anesthesia can  
123 succeed if susceptible lineages are used. More broadly, our findings highlight the  
124 importance of including a diversity of strains or lineages when optimizing methods or

125 developing protocols that interface with phenotypes that plausibly feature intraspecific  
126 genetic variation.

127

## 128 **METHODS**

### 129 ***Anesthesia experiment***

130 We followed the definition of successful anesthesia provided by Lewbart and Mosley  
131 (2011), who considered the snail to be anesthetized when the animal shows no tentacle  
132 withdrawal or body movement following the gentle scrape of its foot with a needle  
133 ("needle test"). For the experiments presented herein, we applied the anesthetization  
134 protocol used for *P. antipodarum* by Krois et al. (2013). The process begins with the  
135 addition of 200 mL of room-temperature carbon-filtered tap water to a ~1/2-L plastic cup  
136 held in a room-temperature laboratory. We then added the *P. antipodarum* to be  
137 anesthetized to the cup, immediately followed by the addition of 2 g of crushed menthol  
138 crystals. After 90 minutes of exposure, we removed the snails from the menthol water.  
139 We defined anesthesia as successful if the body of the snail was relaxed such that the  
140 tentacles, head, and foot had emerged from the shell and there was no withdrawal or  
141 body movement during the needle test (administered with a 25-gauge needle). We  
142 deemed anesthesia as unsuccessful if the snail was fully contracted into the shell or if  
143 the snail was relaxed but failed the needle test.

144 We then administered this anesthesia protocol to each of six groups of ten snails  
145 (N = 60 snails per lineage) from each of 17 different *P. antipodarum* triploid asexual  
146 lineages, for a total of 102 trials and 1020 snails (Table 1). While each of the 17  
147 lineages was founded by a single unique asexual female and was cultured separately in

148 its own tank, three pairs of lineages (six of the 17 lineages) shared descent from the  
149 same field-collected grandmother. These founding grandmothers were sampled from  
150 natural populations in 2017, about two generations before the birth of the snails used  
151 here. Snails, lineages, and lakes were chosen as a combined function of snail  
152 availability and the existence in culture of multiple lineages per lake. While we cannot  
153 formally rule out the possibility that transgenerational effects of lake of origin (apart from  
154 genetic variation *per se*) are still influencing snail phenotypes, we believe that it is  
155 reasonable to expect that several generations of culture in a standardized laboratory  
156 environment should provide ample time to minimize such effects.

157         We expected that these three pairs of lineages (each pair defined by descent  
158 from the same grandmother) would be genetically identical (barring *de novo* mutations)  
159 across pair members (hereafter, "clonemates"). We were able to back up these  
160 assumptions by leveraging single-nucleotide polymorphism (SNP) data (see "SNP  
161 genotyping"). By enabling comparisons between clonemates (N = three pairs) as well as  
162 across genetically distinct lineages ("non-clonemates"; 14 lineages, including those  
163 three lineage pairs), our set of lineages thus allows us to test whether genetic factors  
164 influence anesthesia success.

165         All of the snails in our experiment were born and raised in the same constant-  
166 temperature room, under identical feeding and culture conditions (following standard of  
167 care for *P. antipodarum*; e.g., Zachar and Neiman 2013). The snails used for the trials  
168 were haphazardly selected from the adult snails in the 15 L tanks used to house each  
169 lineage and were not reused across trials. Our measure of anesthesia success per trial



170 was the percentage of snails, out of the ten snails per lineage per trial, that were  
171 successfully anesthetized.

172 Because the anesthesia success data were not distributed normally (Kolmogorov-  
173 Smirnov test; test statistic = 0.111,  $df = 102$ ,  $p = 0.003$ ), we used a non-parametric  
174 Kruskal-Wallis test to first address whether there was a significant effect of lineage  
175 founder ("grandmother") on anesthesia success. A significant outcome of this Kruskal-  
176 Wallis analysis will indicate that the descendants of different grandmothers respond  
177 differently to anesthesia. Because the founding grandmothers constituted separately  
178 sampled snails from highly diverse New Zealand populations (e.g., Paczesniak et al.  
179 2013; Verhaegen et al. 2018), this outcome is consistent with a major role of genetic  
180 variation for anesthesia success in *P. antipodarum*.

181 We next used the lineage-level anesthesia success data to address whether the  
182 three pairs of clonemates were significantly more similar in anesthesia success rates  
183 than were non-clonemate pairs. We began by calculating the absolute value of the  
184 difference in anesthesia success rates ("difference scores") between the means of the  
185 six success rates measured for each of the 17 lineages relative to each of the other  
186 lineages. For example, this value for Alex 13 relative to Alex 27 is the absolute value of  
187  $0.23$  (Alex 13 mean success rate) -  $0.92$  (Alex 27 mean success rate), equivalent to  
188  $0.69$ . There were a total of three unique pairwise difference scores for the clonemates  
189 (reflecting the three pairs of clonemates) and a total of 136 unique pairwise difference  
190 scores for the non-clonemate comparisons. We then used one-sample sign tests (as  
191 implemented at  
192 <https://www.mathcelebrity.com/nonparam.php?pl=Generate+Practice+Problem>) relative

193 to a test value of zero, to determine whether the clonemates and non-clonemate  
194 difference scores, respectively, were significantly different than zero. In a scenario  
195 where genetic background is an important determinant of anesthesia success, the  
196 clonemate difference score would not be significantly different than zero, while the non-  
197 clonemate score should be significantly higher than zero. Except where indicated  
198 otherwise, all statistical analyses and figures were executed and drawn, respectively, in  
199 IBM SPSS Statistics v. 25.

200

### 201 ***SNP Genotyping***

202 As part of a larger and distinct population genomics project, we used KASP™ assays to  
203 genotype 14 of the 17 lineages at 49 of the 50 SNPs used in Verhaegen et al. (2018)  
204 (Online Resource 1). We began by using the same chloroform-phenol DNA extraction  
205 method described in Sharbrough et al. (2018) on the dissected head tissue of one  
206 randomly selected adult snail from each of the fourteen lineages. We then sent the DNA  
207 extractions to LGC Genomics (Hoddesdon, UK) for SNP genotyping. Upon receiving the  
208 raw data, we assigned SNP genotypes by using the infinite alleles model distance  
209 index, setting the maximum distance threshold defining a genotype (Rogstad et al.  
210 2002) to zero differences (excluding the three sites of 686 total genotyped for which the  
211 genotype was not able to be called) with GenoDive software v.2.0 (Meirmans and Van  
212 Tienderen 2004).

213

## 214 **RESULTS**

215 Our analyses revealed wide across-lineage variation in anesthesia outcome between  
216 lineages descended from different grandmothers (Kruskal-Wallis,  $p < 0.001$ ; Figure 1),  
217 ranging from a median of 95% of all snails anesthetized for several different lineages  
218 from lake Alexandrina to ~8% for Grasmere 59 (Table 1). This result is as is expected if  
219 there is a major genetic component to anesthesia success in *P. antipodarum*.

220 The difference score between clonemates was not significantly different than zero  
221 (one-sample sign test;  $p = 0.125$ ), with the caveat that we had only three comparisons  
222 and thus low statistical power. By contrast, the difference score between non-  
223 clonemates was significantly higher than zero ( $p = 0.002$ ) and was nearly twice as high  
224 (mean difference score  $0.340 \pm 0.231$  SD) as the mean difference score for the  
225 clonemates (mean difference score =  $0.173 \pm 0.132$  SD; Fig. 2). These results are also  
226 consistent with a scenario where genetic factors influence anesthesia success in *P.*  
227 *antipodarum*, though a firm conclusion awaits validation from a follow-on experiment  
228 with substantially more statistical power.

229 There were eight distinct SNP genotypes across the 14 lineages genotyped  
230 (Table 1). These SNP data demonstrated that the two pairs of clonemates that were  
231 genotyped (Alex 19\_1 and Alex 19\_2 and Grasmere 49\_1 and Grasmere 49\_2) indeed  
232 shared SNP genotypes. These data also revealed that most other non-clonemate  
233 lineages themselves had unique genotypes. Finally, we discovered that the two sets of  
234 lineages with different grandmothers that nevertheless shared SNP genotypes 4 and  
235 26, respectively, had strikingly similar anesthesia success rates relative to other  
236 lineages with different SNP genotypes (Fig. 1).

237

238 **DISCUSSION**

239 Together, our data indicate that genetic background is a major contributor to menthol  
240 anesthesia success in *P. antipodarum*, an important model system in evolutionary  
241 biology, ecology, and ecotoxicology. This is the first demonstration of which we are  
242 aware of a genetic component to variation in anesthesia efficacy in mollusks. One  
243 obvious practical implication of these results for *P. antipodarum* researchers is the  
244 opportunity to select lineages with higher anesthesia susceptibility for experiments that  
245 require anesthetics. That genetic background influences anesthesia success in a wide  
246 variety of common model systems like flies, worms, and mice suggests that the same  
247 might be expected for other mollusk taxa. Considered even more broadly, our findings  
248 emphasize the critical importance of including representative intraspecific genetic  
249 diversity when optimizing methods or protocols for a model organism.

250 We were able to perform a powerful independent validation of the likelihood that  
251 genetic variation does underlie across-lineage variation in anesthesia success in *P.*  
252 *antipodarum* by leveraging single-nucleotide polymorphism (SNP) data generated for a  
253 different population genomic project. These data backed up our assumptions about the  
254 genetic identity of clonemates relative to non-clonemates and also revealed that  
255 lineages not previously known to be close relatives that shared a SNP genotype  
256 seemed to have very similar anesthesia outcomes relative to lineages with different  
257 SNP genotypes, though the strength of this conclusion is limited by low statistical  
258 power.

259 Two important questions worthy of future study emerge from our results. First,  
260 what is the genetic basis of the across-lineage variation in anesthesia success?

261 Second, even though clonemates seem to share similar anesthesia success outcomes  
262 relative to non-clonemates, why do we not see identical responses (i.e., no examples of  
263 100% success or 100% failure) within clonemates?

264 The first question can be addressed by using techniques such as RNA  
265 sequencing and whole-genome sequencing to identify gene expression differences and  
266 genetic variants differentiating lineages with very distinct anesthesia responses.  
267 Because multiple studies indicate that asexual *P. antipodarum* lineages from the same  
268 lake population are typically closely related relative to asexual lineages from other lakes  
269 (e.g., Paczesniak et al. 2013), a powerful experiment might be one that compared  
270 genomic sequence from lineages from the same lake with different anesthesia  
271 responses. A good example of such lineages in the experiment we describe here is  
272 provided by low-responding lineages from lake Alexandrina like Alex 13 (23.33%  
273 anesthesia success) and Alex 21 (15% anesthesia success) as compared to Alex 27  
274 (91.67% anesthesia success) and Alex 32 and 36 (95% anesthesia success).

275 The second question, regarding variation in anesthesia success even within  
276 clones and clonemates, hints that other factors (e.g., size, age, body condition) could  
277 influence anesthesia outcomes (e.g., Larsson and Wahlström 1998; Guenette and Lair  
278 2006; Gao et al. 2018). While we made a distinct effort to minimize age and size effects  
279 by choosing the largest snails possible from each lineage, we did not know the ages of  
280 individual snails. Nor are we able to exclude the possibility that across-snail differences  
281 in size, health, or body condition could have come into play.

282 We were able to provide an initial assessment of a potential role for snail  
283 size/age by quantifying the length (measuring the longest possible distance between

284 apex and aperture under a dissecting microscope) of each of 30 haphazardly selected  
285 individuals from each of the 60 individuals used for anesthesia trials for each lineage.  
286 This value is meaningful for *P. antipodarum* because the snails increase in body length  
287 until reproductive maturity, though across-lineage variation in adult size means that  
288 some adult snails are larger than others (Larkin et al. 2016). We then used a  
289 Spearman's correlation analysis to determine whether the mean body length per lineage  
290 was associated with the median anesthesia success for each lineage.

291 We predicted that a strong effect of age or size on our results would manifest in a  
292 relationship between body length and anesthesia success outcomes. Not only did this  
293 analysis not reveal any such relationship (Spearman's correlation coefficient = -0.06,  $p =$   
294 0.82; Fig. 3), but the two Alex 19 lineages, with mean body lengths differing by over a  
295 millimeter (likely reflecting different demographic structure in the source tanks)  
296 nevertheless had virtually identical anesthesia success. This result, though preliminary,  
297 does provide an independent line of support that genetic differences across lineages  
298 are a main driver of differences in anesthesia success rates. Future experiments could  
299 address a role for size, body condition, or age more directly by comparing anesthesia  
300 success within a lineage as a function of snail age or in the context of experimental  
301 manipulation of factors like food availability.

302

### 303 REFERENCES CITED

304 American Veterinary Medical Association 2020 The AMVA Guidelines for the  
305 Euthanasia of Animals: 2020 Edition.

- 306 Bankers L, Fields P, McElroy KE, Boore JL, Logsdon JM Jr, Neiman M (2017) Genomic  
307 evidence for population-specific responses to coevolving parasites in a New  
308 Zealand freshwater snail. *Mol Ecol* 26:3663-3675.
- 309 Butler-Struben HM, Brophy SM, Crook RJ (2018) *In vivo* recording of neural and  
310 behavioral correlates of anesthesia induction, reversal, and euthanasia in  
311 cephalopod molluscs. *Front Physiol* 9:109.
- 312 Chesler E, Ritchie J, Kokayeff A, Lariviere WR, Wilson SG, Moghil JS (2003) Genotype-  
313 dependence of gabapentin and pregabalin sensitivity: the pharmacogenetic  
314 mediation of analgesia is specific to the type of pain being inhibited. *Pain*  
315 106:325-335.
- 316 Cooper JE (2011) Anesthesia, analgesia, and euthanasia of invertebrates. *ILAR Journal*  
317 52:196-204.
- 318 Crook RJ, Hanlon RT, Walters ET (2013) Squid have nociceptors that display  
319 widespread long-term sensitization and spontaneous activity after bodily injury. *J*  
320 *Neurosci* 33:10021-10026.
- 321 Donne C, Neiman M, Woodell JD, Haase M, Verhaegen G (2020) A layover in Europe:  
322 reconstructing the invasion route of asexual lineages of a New Zealand snail to  
323 North America. *Mol Ecol* in press, <https://doi.org/10.1111/mec.15569>.
- 324 d'Ovidio D, Monticelli P, Santoro M, Adami C (2019) Immersion anesthesia with ethanol  
325 in African giant land snails (*Acathina fulica*). *Heliyon* 5:e01546.
- 326 Fiorito G, Affuso A, Basil J, Cole A, de Girolamo P, D'Angelo L, Dickel L, Gestal C,  
327 Grasso F, Kuba M, Mark F, Melillo D, Osorio D, Perkins K, Ponte G, Shashar N,  
328 Smith D, Smith J, Andrews PLR (2015) Guidelines for the care and welfare of

- 329 cephalopods in research- a consensus based on an initiative by CephRes,  
330 FELASA, and the Boyd group. *Lab Anim* 49:1-90.
- 331 Gao J, Hu Z, Shi L, Li N, Ouyang Y, Shu S, Yao S, Chen X (2018) HCN channels  
332 contribute to the sensitivity of intravenous anesthetics in developmental mice.  
333 *Oncotarget* 9:12907–12917.
- 334 Geiß C, Ruppert K, Askem C, Barroso C, Faber D, Ducrot V, Holbech H, Hutchinson  
335 TH, Kajankari P, Kinnberg KL, Lagadic L, Matthiessen P, Morris S, Neiman M,  
336 Penttinen O-P, Sanchez-Marin P, Tiegeler M, Weltje L, Oehlmann J (2017)  
337 Validation of the OECD Reproduction Test Guideline with the New Zealand  
338 mudsnail *Potamopyrgus antipodarum* using trenbolone and prochloraz.  
339 *Ecotoxicology* 26:370-382.
- 340 Gilbertson CR, Wyatt JD (2016) Evaluation of euthanasia techniques for an invertebrate  
341 species, land snails (*Succinea putris*). *J Am Assoc Lab Anim Sci* 55:577-581.
- 342 Guan Z, Scott RL, Nash HA (2000) A new assay for the genetic study of general  
343 anesthesia in *Drosophila melanogaster*. Use in analysis of mutations in the X-  
344 chromosomal 12E region. *J Neurogenet* 14:25-42.
- 345 Guenette SA, Lair S (2006) Anesthesia of the leopard frog, *Rana pipiens*: A  
346 comparative study between four different agents. *J Herpetol Med Surg* 16:38-44.
- 347 Hawasli AH, Saifee O, Liu C, Nonet ML, Crowder CM (2004) Resistance of volatile  
348 anesthetics by mutations enhancing excitatory neurotransmitter release in  
349 *Caenorhabditis elegans*. *Genetics* 168:831-843.



- 350 Krois NR, Cherukuri A, Puttagunta N, Neiman M (2013) Higher rate of tissue  
351 regeneration in polyploid asexual vs. diploid sexual freshwater snails. *Biol Lett*  
352 9:20130422.
- 353 Larsson J, Wahlström G (1998) The influence of age and administration rate on the  
354 brain sensitivity to propofol in rats. *Acta Anaesthesiol Scand* 42:987-994.
- 355 Lewbart GA, Mosley C (2011) Clinical anesthesia and analgesia in invertebrates. *J Exot*  
356 *Pet Med* 21:59-70.
- 357 Lively CM (1987) Evidence from a New Zealand snail for the maintenance of sex by  
358 parasitism. *Nature* 328:519-521.
- 359 Logsdon JM Jr, Neiman M, Boore J, Sharbrough J, Bankers L, McElroy K, Jalinsky J,  
360 Fields P, Wilton P (2017) A very recent whole genome duplication in *Potamopyrgus*  
361 *antipodarum* predates multiple origins of asexuality and associated polyploidy. *PeerJ*  
362 *Preprints* 5:e3046v3041.
- 363 Magnuson R (2018) An exploration of alternative anesthesia in the difficult-to-  
364 anesthetize New Zealand freshwater snail *Potamopyrgus antipodarum*. *Iowa*  
365 *Research Online*.
- 366 Meirmans PG, Van Tienderen PH (2004) GENOTYPE and GENODIVE: two programs  
367 for the analysis of genetic diversity of asexual organisms. *Mol Ecol Notes* 4:792–794.
- 368 McCraw BM (1958). Relaxation of snails before fixation. *Nature* 181:575.
- 369 Moghil JS, Smith SB, O'Reilly MK, Plourde G (2005) Influence of nociception and  
370 stress-induced antinociception on genetic variation in isoflurane anesthetic  
371 potency among mouse strains. *Anesthesiology* 103:751-758.

- 372 Morgan PG, Sedensky MM (1994) Mutations conferring new patterns of sensitivity to  
373 volatile anesthetics in *Caenorhabditis elegans*. *Anesthesiology* 81:888-898.
- 374 Nash HA (2002) *In vivo* genetics of anaesthetic action. *Br J Anaesth* 89:143-155.
- 375 National Academies of Sciences, Engineering, and Medicine 2020. Next steps for  
376 functional genomics: Proceedings of a workshop. Washington, DC: The National  
377 Academies Press. <https://doi.org/10.17226/25780>.
- 378 Neiman M, Larkin K, Thompson AR, Wilton P (2012) Male offspring production by  
379 asexual *Potamopyrgus antipodarum*, a New Zealand snail. *Heredity* 109:57-62.
- 380 Neiman M, Jokela J, Lively CM (2005) Variation in asexual lineage age in  
381 *Potamopyrgus antipodarum*, a New Zealand snail. *Evolution* 59:1945-1952.
- 382 Neiman M, Paczesniak D, Soper DM, Baldwin AT, Hehman G (2011) Wide variation in  
383 ploidy level and genome size in a New Zealand freshwater snail with coexisting  
384 sexual and asexual lineages. *Evolution* 65:3203–3216.
- 385 Paczesniak D, Jokela J, Larkin K, Neiman M (2013) Discordance between nuclear and  
386 mitochondrial genomes in sexual and asexual lineages of the freshwater snail  
387 *Potamopyrgus antipodarum*. *Mol Ecol* 22:4695-4710.
- 388 Poole T (1997) Happy animals make good science. *Lab Anim* 31:116-124.
- 389 Rogstad SH, Keane B, Beresh J (2002) Genetic variation across VNTR loci in central  
390 North American *Taraxacum* surveyed at different spatial scales. *Plant Ecol*  
391 161:111–121.
- 392 Roper CFE, Hochberg FG (1988) Behavior and systematics of cephalopods from Lizard  
393 Island, Australia, based on color and body patterns. *Malacologia* 29:153-193.

394 Scientific Panel on Animal Health and Welfare (AHAW) (2005) Opinion of the Scientific  
395 Panel on Animal Health and Welfare (AHAW) on a request from the Commission  
396 related to the 'Aspects of the biology and welfare of animals used for  
397 experimental and other scientific purposes'. EFSA J:1-136.

398 Seltzer Z (2014) Nothing in pain makes sense except in the light of genetics. Pain  
399 2014:841-842.

400 Sharbrough J, Luse M, Boore JL, Logsdon JM Jr, Neiman M (2018) Radical amino acid  
401 mutations persist longer in the absence of sex. Evolution 72:808-824.

402 Steele LM, Morgan PG, Sedensky MM (2007) Genetics and the mechanisms of action  
403 of inhaled anesthetics. Curr Pharmacogenom 5:125-141.

404 Verhaegen G, McElroy K, Bankers L, Neiman M, Haase M (2018) Adaptive phenotypic  
405 plasticity in a clonal invader. Ecol Evol 8:4465-4483.

406 Wells MJ (1978) Octopus: Physiology and behavior of an advanced invertebrate.  
407 Chapman and Hall, London.

408 Zachar N, Neiman M (2013) Profound effects of population density on fitness-related  
409 traits in an invasive freshwater snail. PLoS ONE 8:e80067.

410

411 **Electronic Supporting Material:**

412

413 **ESM\_1** SNP markers genotyped for each of 14 lineages. "?" indicates that the marker  
414 for that snail could not be called accurately

415

416 **Figure Legends and Table Caption:**

417 **Fig. 1** Median percent of successfully anesthetized snails (6 trials of 10 snails each)  
418 subjected to the standard *P. antipodarum* menthol anesthesia protocol per each of 17  
419 lineages founded by 14 different grandmothers. Triangle symbols (vs. circles) are used  
420 to denote the three lineage pairs that each share a grandmother. The numbers above  
421 the 14 of the 17 lineages that were genotyped indicate SNP genotype, with shared  
422 numbers indicating shared SNP genotypes

423

424 **Fig. 2** Median pairwise difference score in anesthesia success for clonemate vs. non-  
425 clonemate lineages. The non-clonemate pairwise difference scores were significantly  
426 higher than zero while the clonemate pairwise difference scores were not significantly  
427 higher than zero

428

429 **Fig 3** Mean size per lineage (mm) vs. median anesthesia success rate (percent) for  
430 each of the 17 lineages. The black diagonal line represents the best-fit linear  
431 relationship between the two variables

432

433 Table 1. Description of the *P. antipodarum* asexual lineages used in this study.

| Lake of Origin | Lineage       | Grandmother | Mean Anesthesia Success % (+/- SD) | Genotyped | SNP Genotype |
|----------------|---------------|-------------|------------------------------------|-----------|--------------|
| Alexandrina    | Alex 13       | Alex 13     | 23.33 +/- 15.01                    | N         | NA           |
| Alexandrina    | Alex 19_1     | Alex 19     | 50.00 +/- 6.32                     | Y         | 3            |
| Alexandrina    | Alex 19_2     | Alex 19     | 53.33 +/- 10.33                    | Y         | 3            |
| Alexandrina    | Alex 21_1     | Alex 21     | 15.00 +/- 8.37                     | Y         | 2            |
| Alexandrina    | Alex 21_2     | Alex 21     | 35.00 +/- 12.25                    | N         | NA           |
| Alexandrina    | Alex 27       | Alex 27     | 91.67 +/- 11.69                    | Y         | 4            |
| Alexandrina    | Alex 31       | Alex 31     | 48.33 +/- 7.53                     | N         | NA           |
| Alexandrina    | Alex 32       | Alex 32     | 95.00 +/- 8.37                     | Y         | 4            |
| Alexandrina    | Alex 36       | Alex 36     | 95.00 +/- 5.48                     | Y         | 5            |
| Alexandrina    | Alex 39       | Alex 39     | 93.33 +/- 8.16                     | Y         | 4            |
| Grasmere       | Grasmere 49_1 | Grasmere 49 | 76.67 +/- 15.01                    | Y         | 26           |
| Grasmere       | Grasmere 49_2 | Grasmere 49 | 48.33 +/- 9.83                     | Y         | 26           |
| Grasmere       | Grasmere 54   | Grasmere 54 | 83.33 +/- 13.66                    | Y         | 26           |
| Grasmere       | Grasmere 59   | Grasmere 59 | 8.33 +/- 7.53                      | Y         | 24           |
| Gunn           | Gunn 6        | Gunn 6      | 36.67 +/- 20.66                    | Y         | 29           |
| Gunn           | Gunn 7        | Gunn 7      | 71.67 +/- 16.02                    | Y         | 26           |
| Gunn           | Gunn 9        | Gunn 9      | 78.33 +/- 14.72                    | Y         | 31           |

434  
435

436

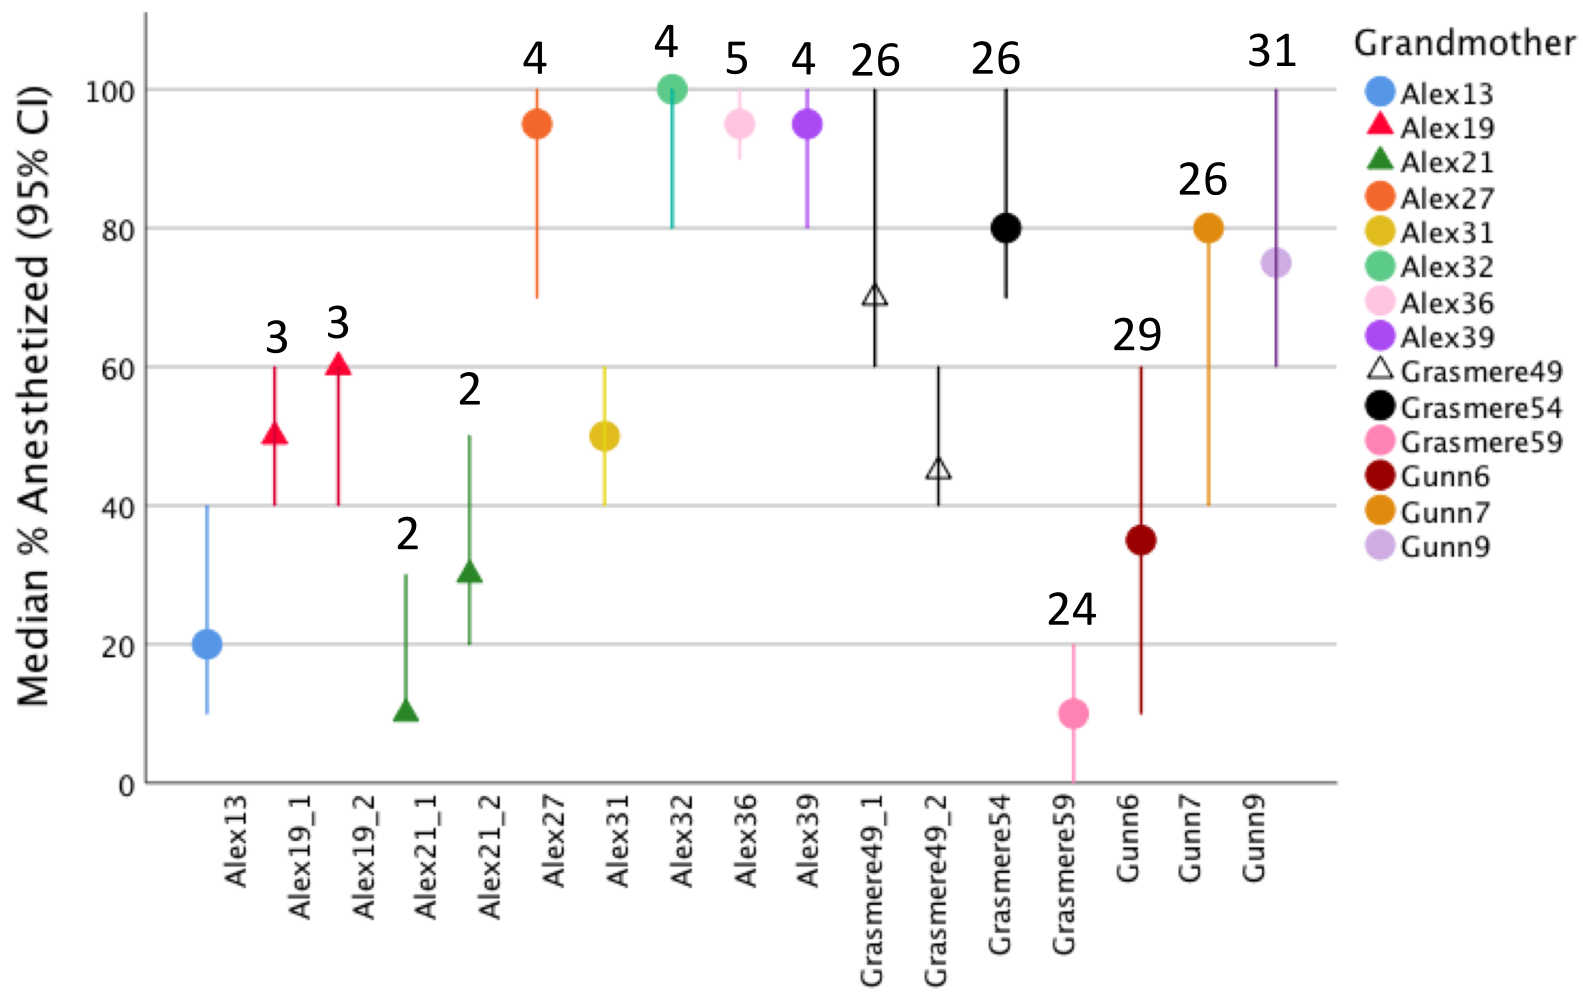

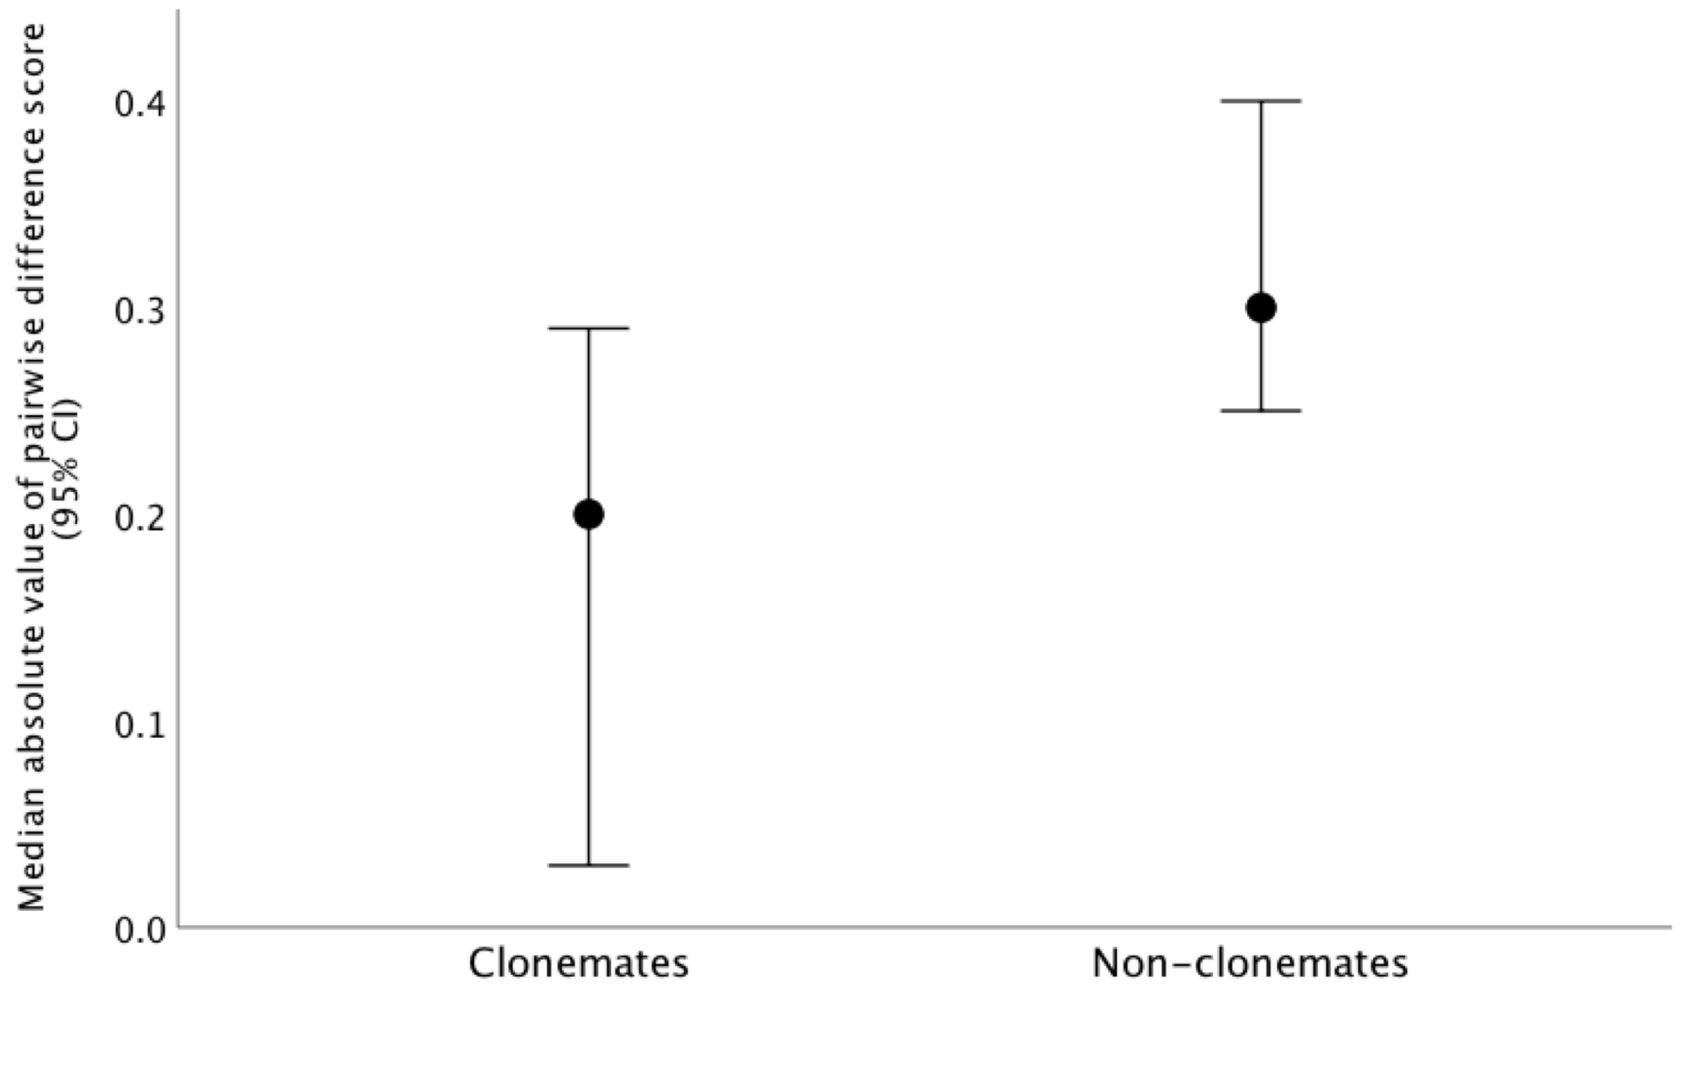

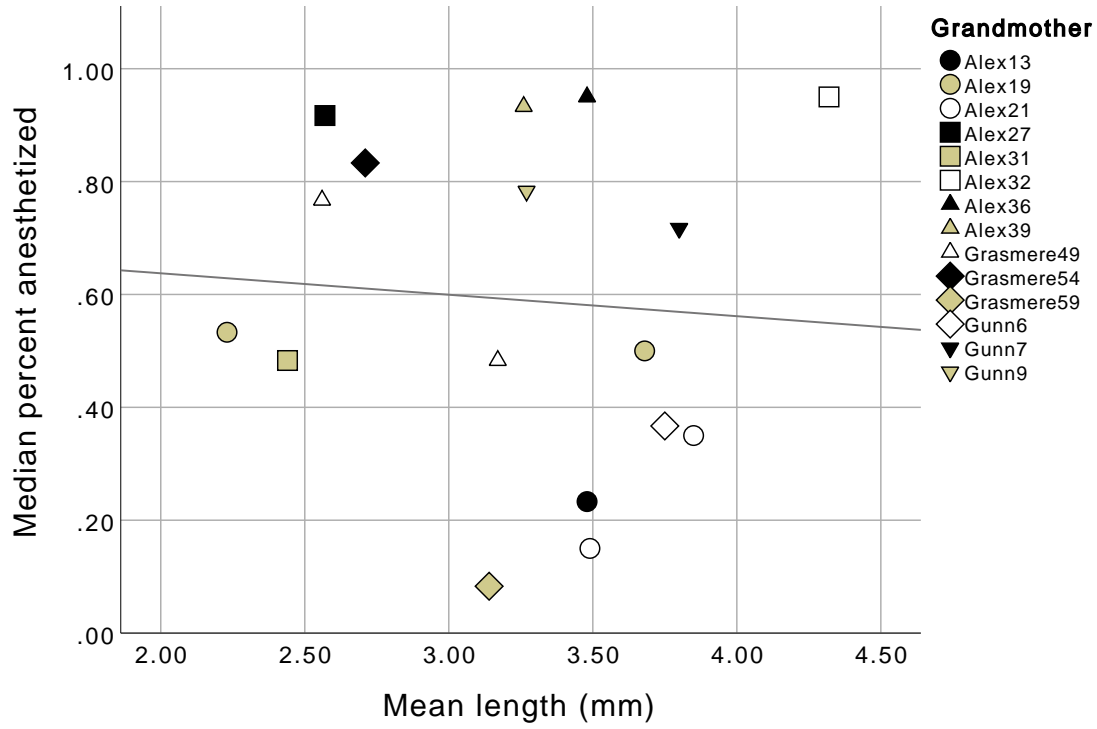

Source: https://www.biorxiv.org/content/10.1101/2020.07.09.194050.full.pdf
